# Supplementary material
Source: Springer Nature journal article supplement (https://www.springermedizin.de/resource/supplementary/12879_2009_845_MOESM6_ESM.pdf/9449910)

**Control**

**LPS**

**Amrinone+LPS**

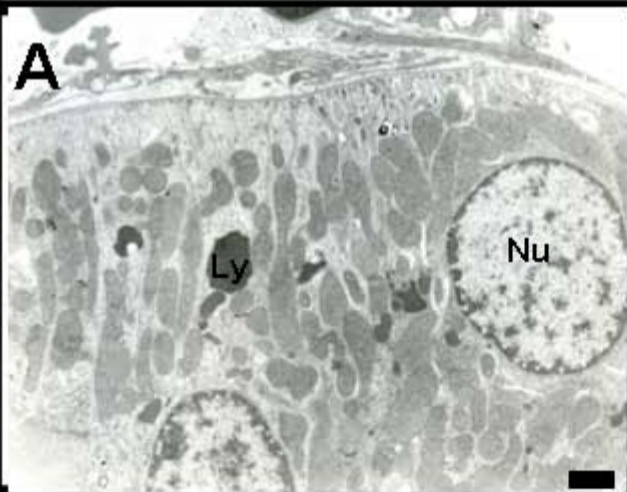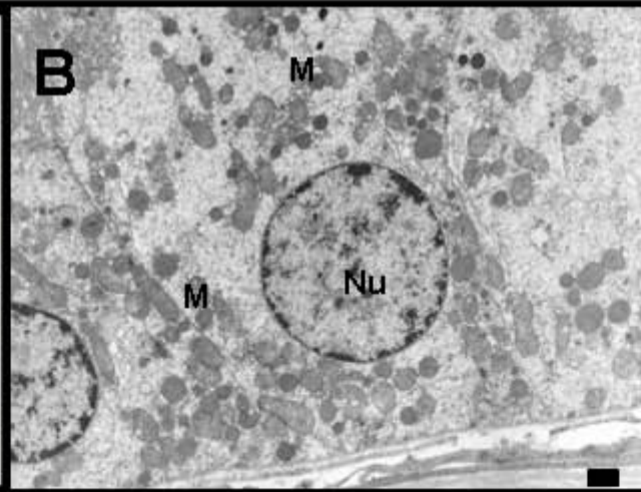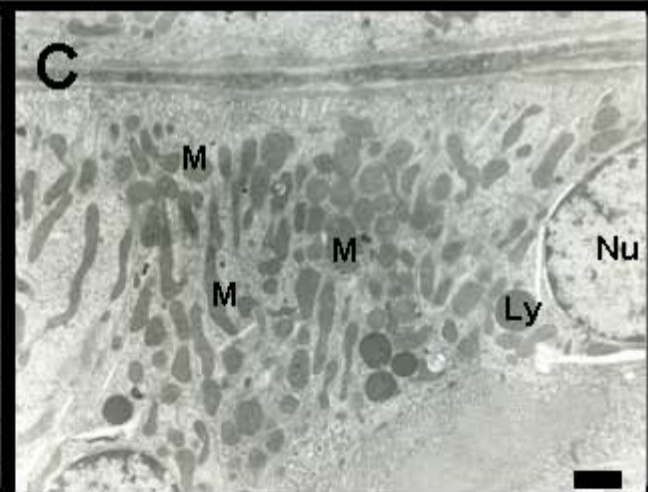

Supplement: MOESM6 [file 9449910]
